# Supplementary material
Source: PubMed Central journal article supplement (PMC2802853)
Supplement: NIHMS161529-supplement-Supplementary.pdf [file NIHMS161529-supplement-Supplementary.pdf]

**Figure S1** SA- $\beta$ -gal staining in replicative senescence and oncogene-induced senescence. **a**, MRC-5 and WI-38 fibroblasts at early passage (upper panels) and at replicative senescence (lower panels). **b**, MRC-5 and WI-38 retrovirally transduced with vector control (upper panels) and pBabe-Puro *ras* (H-*Ras*V12)<sup>1</sup> (lower panels). Note that premature senescence by POT1 knockdown was induced and confirmed by SA- $\beta$ -gal staining as described in our previous study<sup>2</sup>. The dominant-negative TRF2-induced senescence was also as previously described by us<sup>3</sup> and others<sup>4</sup>.

**Figure S2** Regulation of miR-34a expression by p53 and its isoforms. **a**, hTERT-immortalized human fibroblasts (hTERT/NHF)<sup>5</sup> transduced with the shRNA knockdown vector targeting p53<sup>6</sup> (left) or treated with 10  $\mu$ M of Nutlin-3a for 36 h<sup>7</sup> (right) were examined for miR-34a expression, as in Fig. 2a. The data (mean  $\pm$  s.d. from triplicate sample) are shown as the relative expression levels to control cells (-). **b**, Luciferase reporter assay of the miR-34a promoter activity. p53-null MDAH041 cells were retrovirally transduced with p53 isoforms [control vector (-), p53 $\beta$  ( $\beta$ ) or  $\Delta$ 133p53 ( $\Delta$ 133)] and transfected with full-length p53-expressing plasmids [control vector (-), wild-type (wt) or 273H mutant (mut)], miR-34a promoter-luciferase constructs [wild-type (upper panel) or mutated at the p53-binding site (lower panel)], as indicated, and pRL-SV40 (control plasmid driving *Renilla* luciferase). Promoter activities were measured as firefly luciferase activities normalized with *Renilla* luciferase activities. Data are mean  $\pm$  s.d. from quadruplicate samples. \*,  $p < 0.01$ . \*\*,  $p < 0.00001$ . **c**, miR-34a is not upregulated at  $\Delta$ 133p53 knockdown- or p53 $\beta$  overexpression-induced senescence. MRC-5 (upper panel) and WI-38 (lower panel) at early passage (Y) were transfected with siRNA (control,  $\Delta$ 133si-1 or  $\Delta$ 133si-2, as in Fig. 3 and Supplementary Fig. S3) or transduced with retroviral overexpression constructs (vector control or p53 $\beta$ , as in Fig. 4a-c) and examined for miR-34a expression by qRT-PCR, as in Fig. 2a. Replicatively senescent cells (R.S., -, -) were included as the positive control. The data (mean  $\pm$  s.d. from triplicate sample) are shown as the relative expression levels to untreated early-passage cells (Y, -, -).

**Figure S3** Knockdown of endogenous  $\Delta$ 133p53 induces cellular senescence. Early-passage MRC-5 fibroblasts (at passage 32) were transfected with the siRNAs targeting  $\Delta$ 133p53 ( $\Delta$ 133si-1 and  $\Delta$ 133si-2) and a control oligonucleotide and examined in immunoblot analyses (**a**), SA- $\beta$ -gal assay (**b**) and BrdU incorporation assay (**c**), as performed in Fig. 3. \*,  $p < 0.001$ . **d**, No induction of apoptosis by  $\Delta$ 133p53 knockdown. MRC-5 and WI-38 transfected with control,  $\Delta$ 133si-1 and  $\Delta$ 133si-2 oligonucleotides were examined for caspase-3 (top) and PARP (middle, short and long exposure) in immunoblot. RKO cells treated with doxorubicin (DOX) were included as the positive control showing apoptosis.  $\beta$ -actin was a loading control (bottom). No cleaved caspase-3 or PARP was observed in  $\Delta$ 133p53-knocked-down fibroblasts.

**Figure S4** Real-time qRT-PCR analysis of p53 target genes in p53 $\beta$  overexpression-induced cellular senescence. The expression levels in the p53 $\beta$ -overexpressing cells (FLAG-p53 $\beta$ ) are shown as the relative values to those in control cells (Vector). Data are mean  $\pm$  s.d. from triplicate samples. \*,  $p < 0.05$ . \*\*,  $p < 0.01$ .

**Figure S5** p53 $\beta$  overexpression induces cellular senescence in human fibroblasts with ectopically expressed telomerase. **a**, Effects of p53 $\beta$  on cell proliferation. hTERT/NHF cells<sup>5</sup> were transduced with the retroviral vector driving FLAG-tagged p53 $\beta$  or control vector (a zeocin-resistant version). Cell proliferation assay was carried out as in Fig. 4b. **b**, Upregulation of p21<sup>WAF1</sup> by p53 $\beta$  overexpression. **c**, Representative pictures of SA- $\beta$ -gal staining. **d**, Summary of SA- $\beta$ -gal staining. The data were mean  $\pm$  s.d. from three independent experiments. \*,  $p < 0.01$ .

**Figure S6**  $\Delta$ 133p53 overexpression extends the replicative lifespan in human fibroblasts. Late-passage MRC-5 (at passage 55) and WI-38 (at passage 53) were transduced with the FLAG- $\Delta$ 133p53 retroviral vector or the control vector and examined for the cumulative PDL, as in Fig. 4d.

**Figure S7** Immunoblot analyses of p16<sup>INK4a</sup>,  $\Delta$ 133p53 and p53 $\beta$  in human colon adenomas. Eight cases of matched non-adenoma (N) and adenoma (A) tissues were examined for p16<sup>INK4A</sup>,  $\Delta$ 133p53 (**a**) and p53 $\beta$  (**b**).  $\beta$ -actin was the control for normalization. Sixteen and 10 percent SDS-PAGE gels were used in (**a**) and (**b**), respectively. Bi-directional arrows indicate the positions of p53 $\beta$  bands. The data shown in Fig. 5b and 5c (Non-ad and Ad), as well as in **c** below, were from the quantitative analysis of these results. **c**, Paired t-test analyses of p16<sup>INK4a</sup>,  $\Delta$ 133p53 and p53 $\beta$  expression in matched colon adenoma and non-adenoma tissues. The vertical axes are the expression levels normalized with  $\beta$ -actin. The p-values are in the parentheses. Case 1, aqua; case 2, blue; case 3, cyan; case 4, yellow; case 5, lavender; case 6, navy; case 7, purple; and case 8, brown.

**Figure S8** Immunoblot analyses of  $\Delta$ 133p53 and p53 $\beta$  in human colon carcinomas. Twenty-nine cases of matched colon carcinoma (T) and non-carcinoma (N) tissues (Supplementary Table S3) were examined in immunoblot for  $\Delta$ 133p53 expression using 16% SDS-PAGE gels (**a**) and p53 $\beta$  expression using 10% SDS-PAGE gels (**b**).  $\beta$ -actin was the control for normalization. Arrows indicate the positions of p53 $\beta$  bands. Normal colon, non-adenoma and/or adenoma samples were included in each blot for quantitative comparison among different blots and different histopathological types. The data shown in Fig. 5c (Non-ca and Ca), 5d (Carcinoma, stage I, II and III) and 5e, as well as in **c** and **d** below, were from the quantitative analysis of these results. **c and d**, Paired t-test analyses of  $\Delta$ 133p53 and p53 $\beta$  expression in p53 ‘wild-type’ *versus* ‘mutant’ cases of colon carcinomas. Twenty-eight cases of colon carcinomas were classified into two subgroups assumedly with ‘wild-type’ (n = 16) and ‘mutant’ p53 (n = 12), based on the immunohistochemical staining of p53 and MDM2<sup>8,9</sup> (Supplementary Table S3). In each subgroup, the expression levels of  $\Delta$ 133p53 (**c**) and p53 $\beta$  (**d**) were compared between non-carcinoma (Non-ca) and carcinoma tissues by paired t-test. The vertical axes are the expression levels normalized with  $\beta$ -actin. The p-values are in the parentheses. The p53 ‘wild-type’ carcinomas, but not “mutant” carcinomas, expressed significantly higher levels of  $\Delta$ 133p53. p53 $\beta$  was significantly less abundant in carcinoma tissues in both

subgroups because of the marked increase in non-carcinoma tissues (Fig. 5c). The actual values in each of the 28 cases are shown in Supplementary Table S4.

**Figure S9** p53 $\beta$  and  $\Delta$ 133p53 are subject to different mechanisms of protein turnover and differentially regulated by full-length p53. **a**, mRNA expression of full-length p53, p53 $\beta$  and  $\Delta$ 133p53 in early-passage (Y) and senescent (S) fibroblasts. The same sets of cells as in Fig. 1b were analyzed by RT-PCR. For  $\Delta$ 133p53, the lower bands corresponded to the reported  $\Delta$ 133p53 sequences (GenBank DQ186650) and the upper bands were from mRNA with intron 5 unspliced. GAPDH was an internal control. **b**, Proteasomal degradation of full-length p53 and p53 $\beta$ , but not  $\Delta$ 133p53. The same sets of cells as in Fig. 1b were treated with 15  $\mu$ M of the proteasomal inhibitor MG-132 for 8 h (+) and examined for full-length p53,  $\Delta$ 133p53 and p53 $\beta$  expression. -, untreated cells.  $\beta$ -actin was a loading control. **c**, Differential regulation of p53 $\beta$  and  $\Delta$ 133p53 by full-length p53. Early-passage fibroblasts were retrovirally transduced with the full-length (FL) p53 overexpression construct (+) and examined for p53 $\beta$  and  $\Delta$ 133p53 expression. -, cells transduced with control vector.  $\beta$ -actin was a loading control.

**Figure S10** Full scan of immunoblots. **a**, Figure 1b. The rectangular areas of the blots were put together and shown in Fig. 1b as the results of TLQ40, MAP4, CM1 and DO-12 antibodies. The lanes between Y (early passage) and S (senescent) contained protein samples from intermediate passage numbers (MRC-5 at passage 43 and WI-38 at passage 46). **b**, Figure 3a.

## Supplementary References

1. Serrano, M., Lin, A. W., McCurrach, M. E., Beach, D. & Lowe, S. W. Oncogenic ras provokes premature cell senescence associated with accumulation of p53 and p16INK4a. *Cell* **88**, 593-602 (1997).
2. Yang, Q. *et al.* Functional diversity of human protection of telomeres 1 isoforms in telomere protection and cellular senescence. *Cancer Res.* **67**, 11677-11686 (2007).
3. Yang, Q., Zheng, Y. L. & Harris, C. C. POT1 and TRF2 cooperate to maintain telomeric integrity. *Mol. Cell. Biol.* **25**, 1070-1080 (2005).
4. van Steensel, B., Smogorzewska, A. & de Lange, T. TRF2 protects human telomeres from end-to-end fusions. *Cell* **92**, 401-413 (1998).
5. Sengupta, S. *et al.* BLM helicase-dependent transport of p53 to sites of stalled DNA replication forks modulates homologous recombination. *EMBO J.* **22**, 1210-1222 (2003).
6. Brummelkamp, T. R., Bernards, R. & Agami, R. A system for stable expression of short interfering RNAs in mammalian cells. *Science* **296**, 550-553 (2002).
7. Kumamoto, K. *et al.* Nutlin-3a activates p53 to both down-regulate inhibitor of growth 2 and up-regulate mir-34a, mir-34b, and mir-34c expression, and induce senescence. *Cancer Res.* **68**, 3193-3203 (2008).
8. Costa, A. *et al.* p53 gene point mutations in relation to p53 nuclear protein accumulation in colorectal cancers. *J. Pathol.* **176**, 45-53 (1995).
9. Nenutil, R. *et al.* Discriminating functional and non-functional p53 in human tumours by p53 and MDM2 immunohistochemistry. *J. Pathol.* **207**, 251-259 (2005).

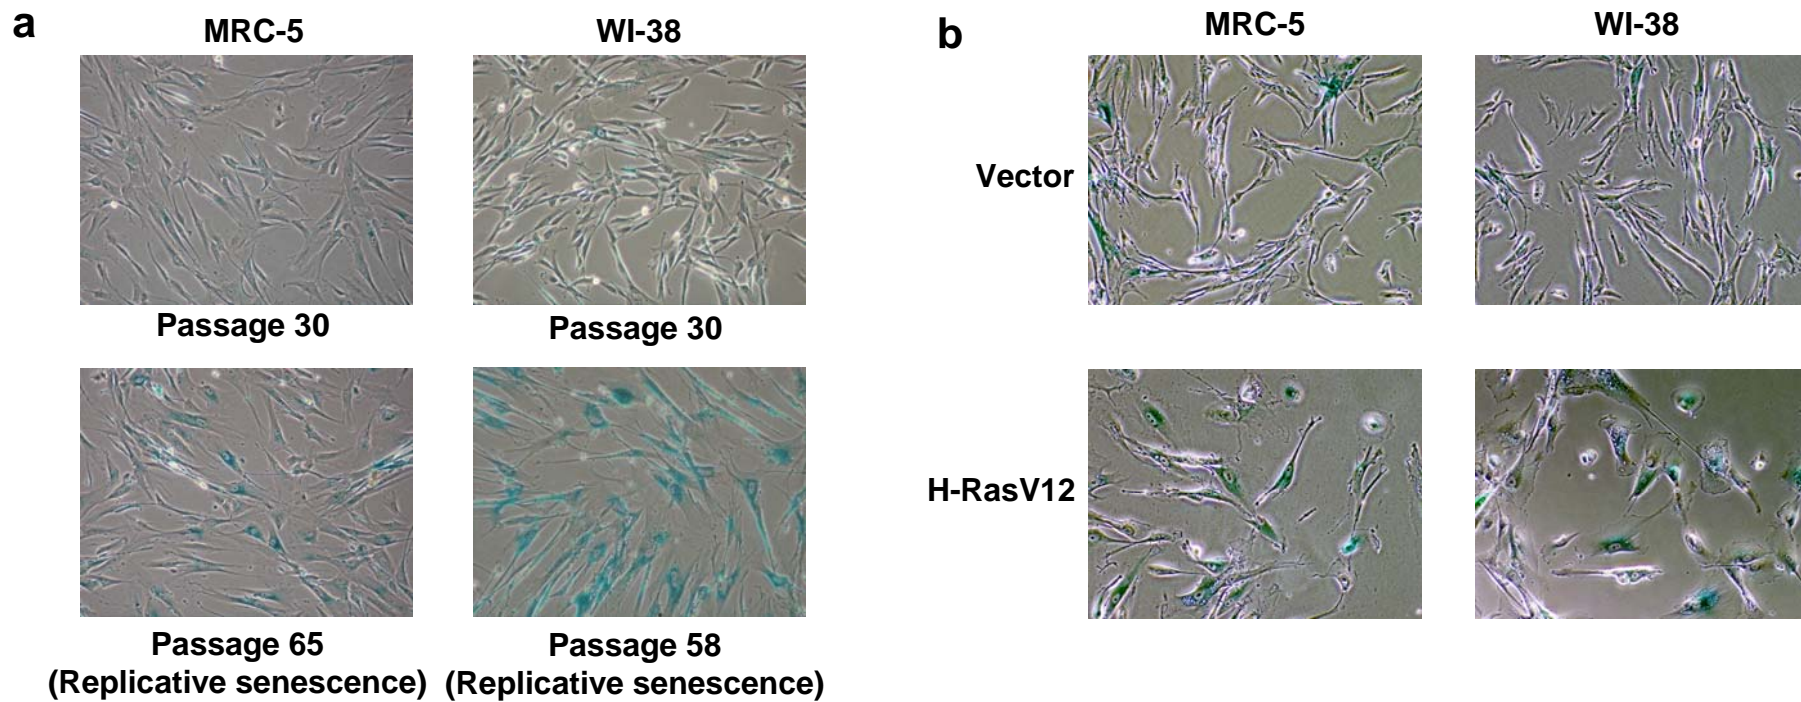

**Supplementary Figure S1. SA- $\beta$ -gal staining in replicative senescence and oncogene-induced senescence.**

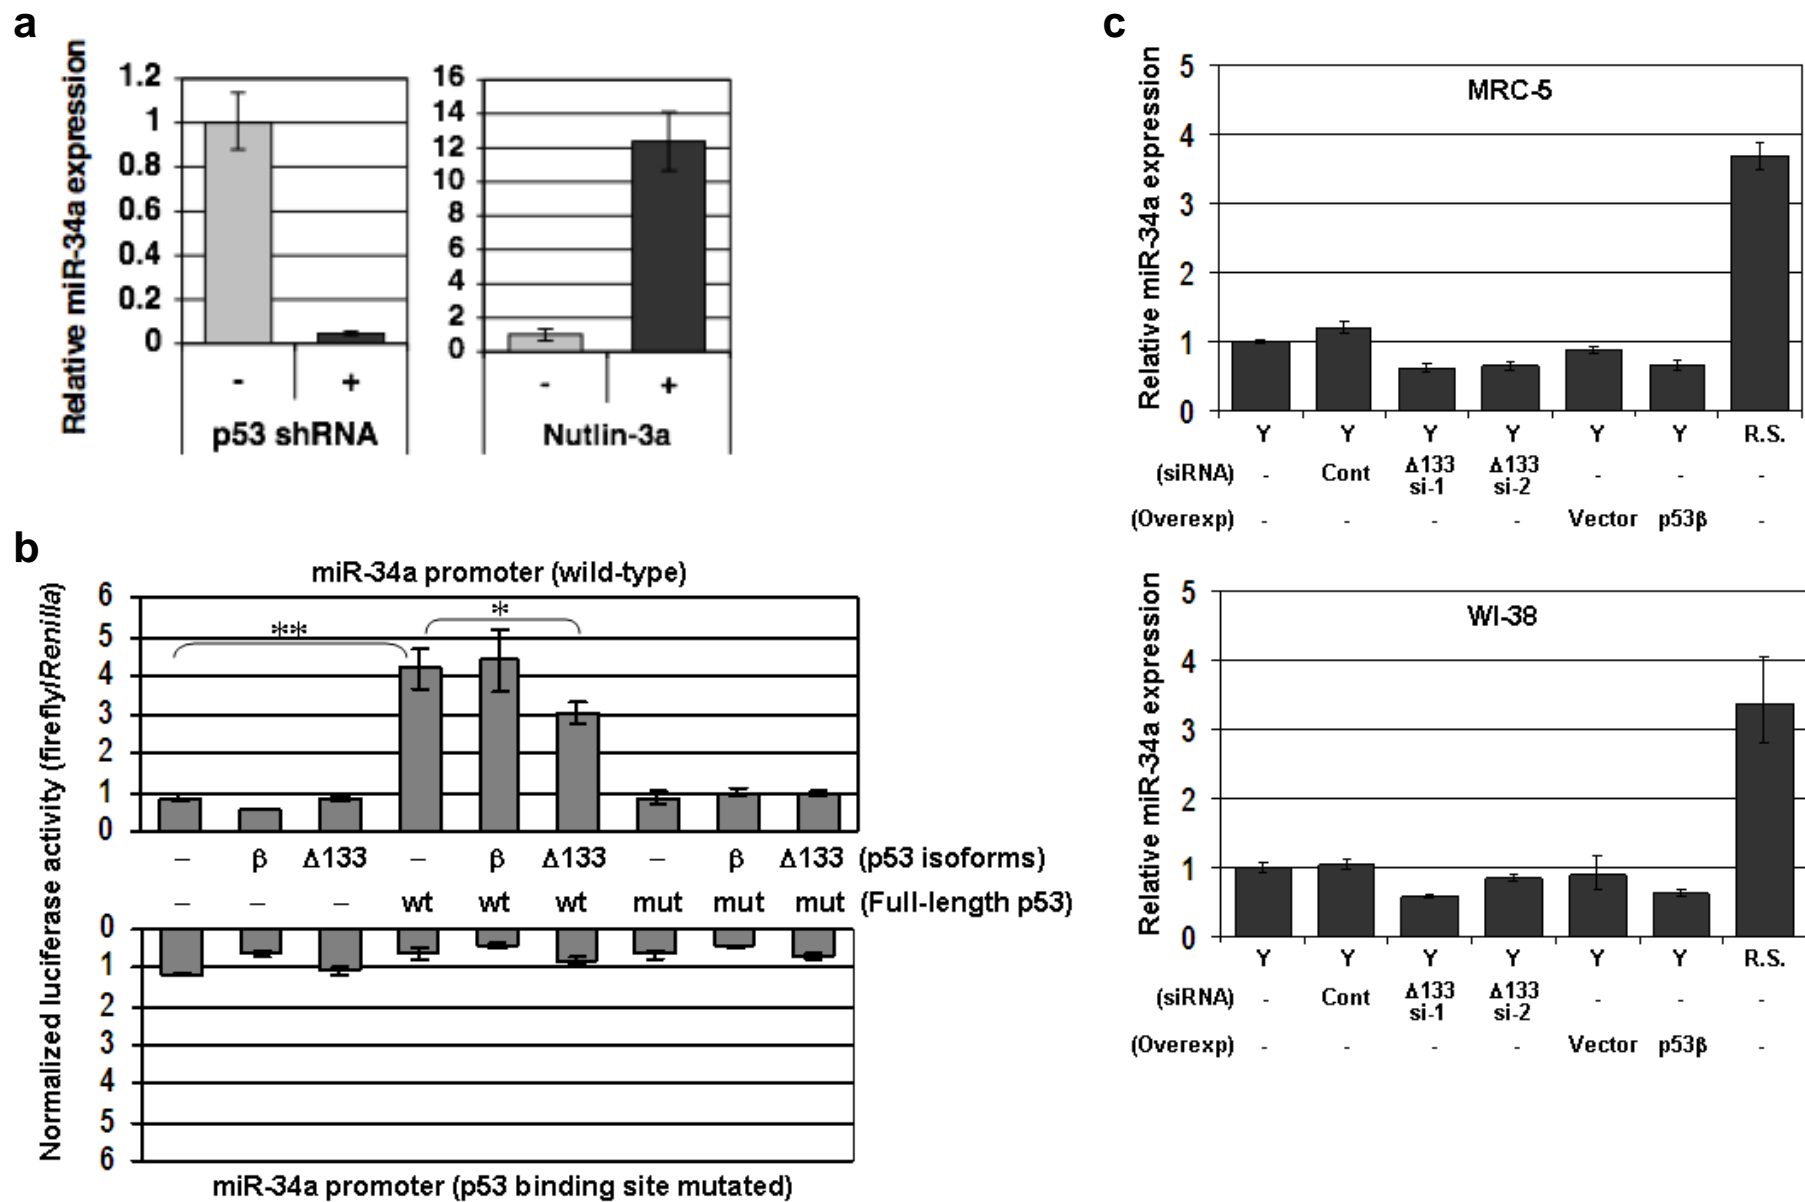

Supplementary Figure S2. Regulation of miR-34a expression by p53 and its isoforms.

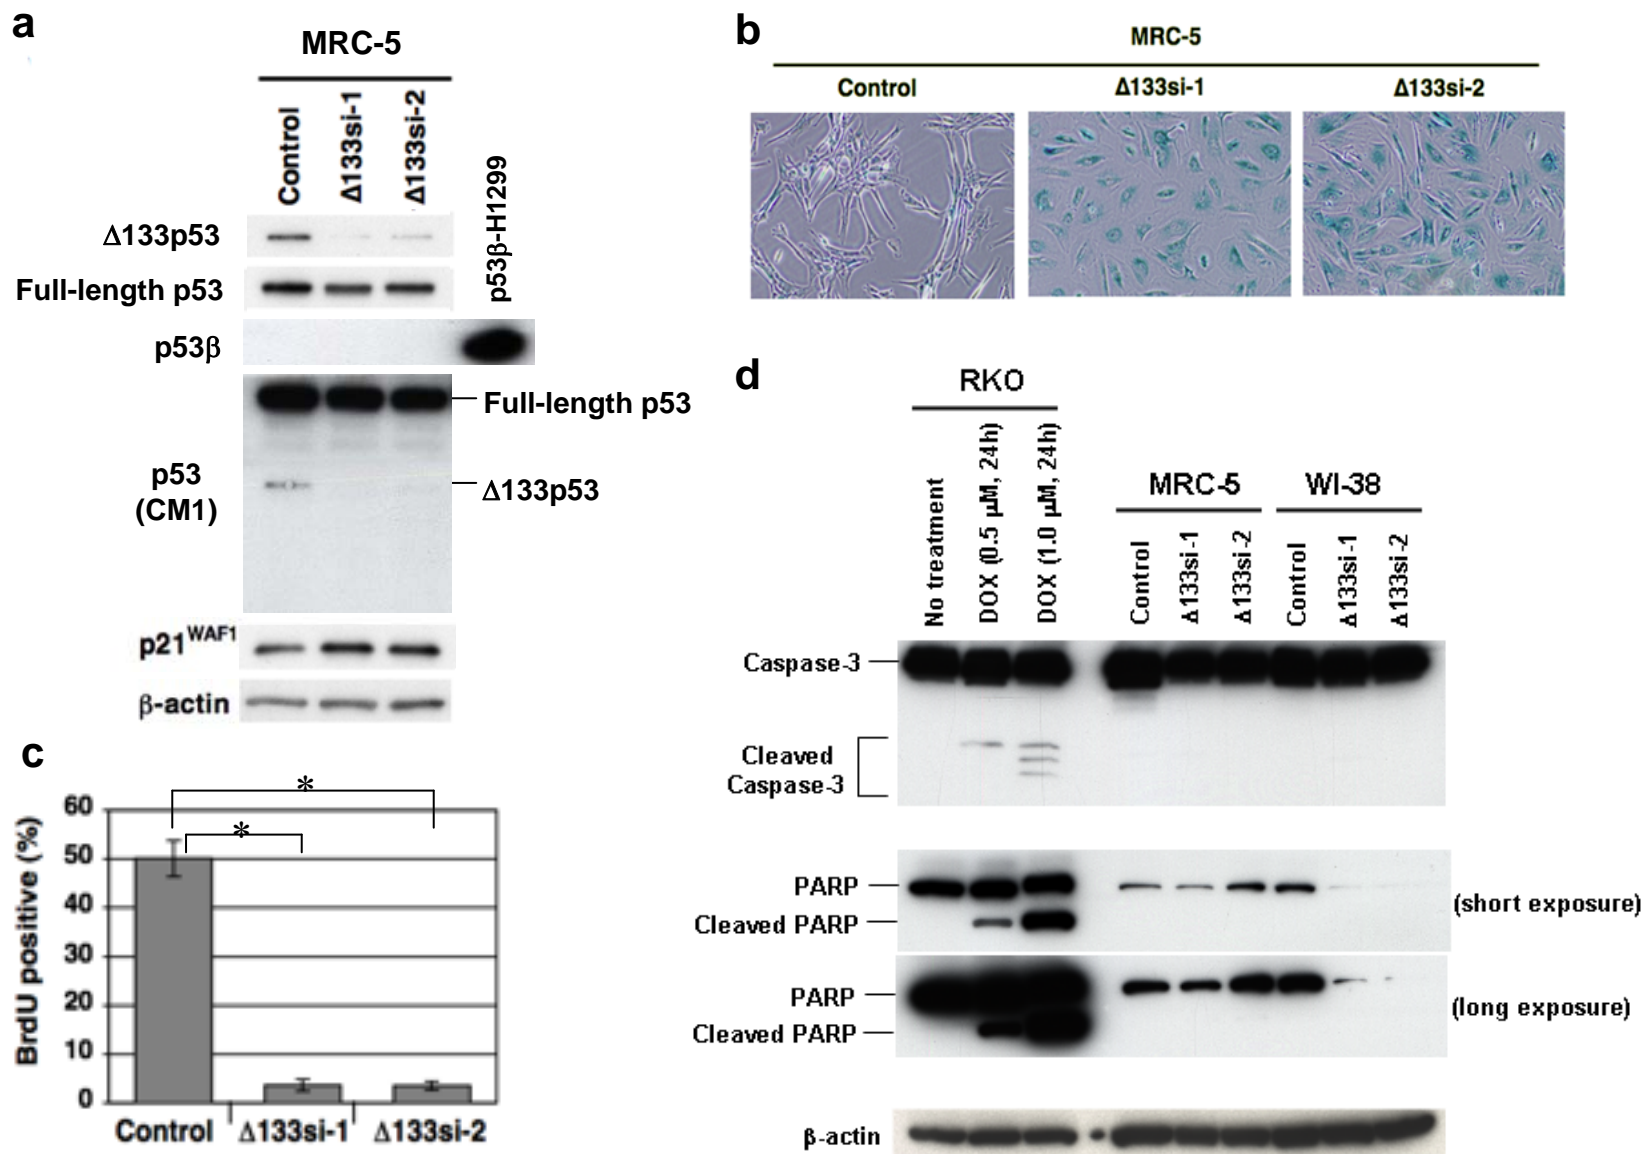

Supplementary Figure S3. Knockdown of endogenous  $\Delta 133\text{p53}$  induces cellular senescence.

WI-38

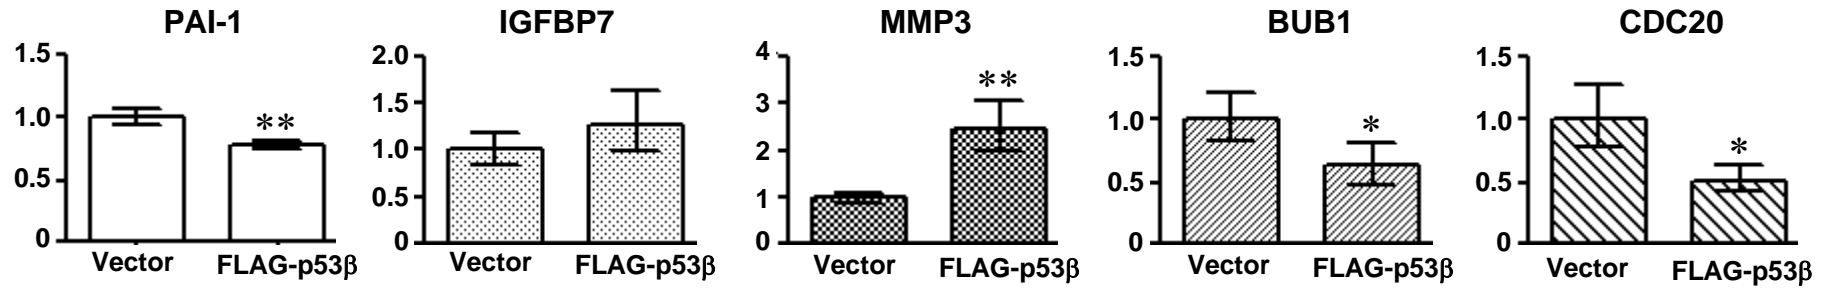

MRC-5

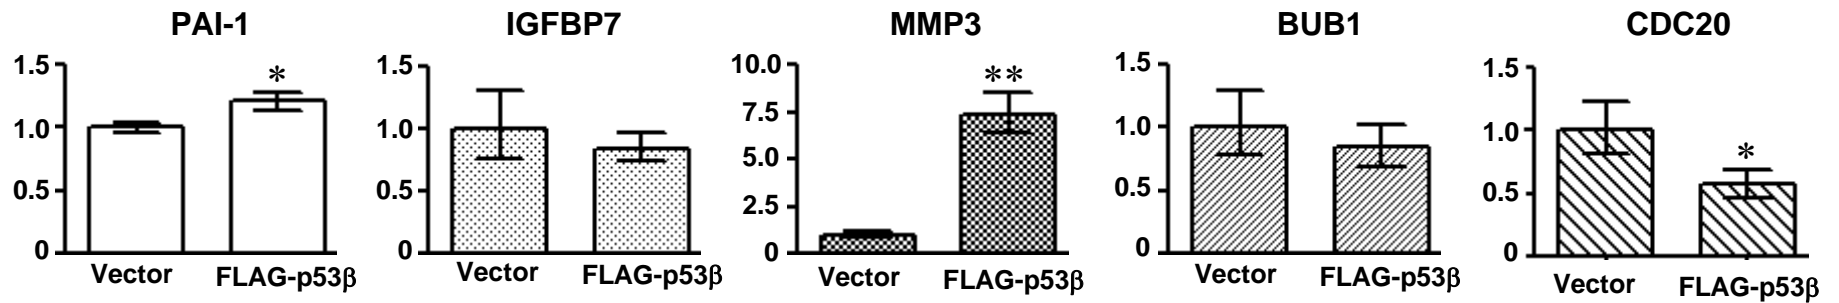

Supplementary Figure S4. qRT-PCR analysis of p53 target genes in p53 $\beta$  overexpression-induced cellular senescence.



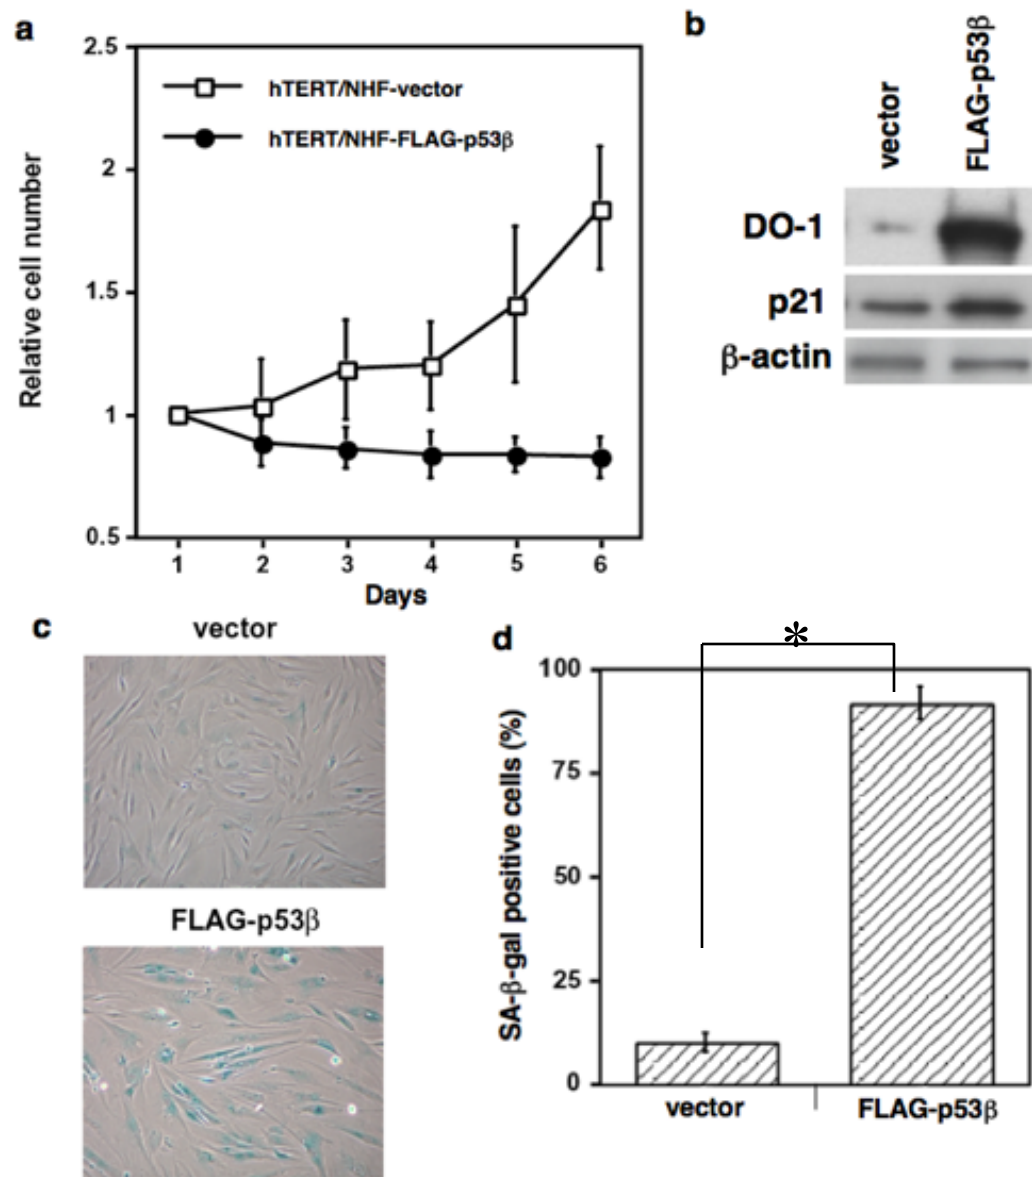

**Supplementary Figure S5. p53 $\beta$  overexpression induces cellular senescence in human fibroblasts with ectopically expressed telomerase.**

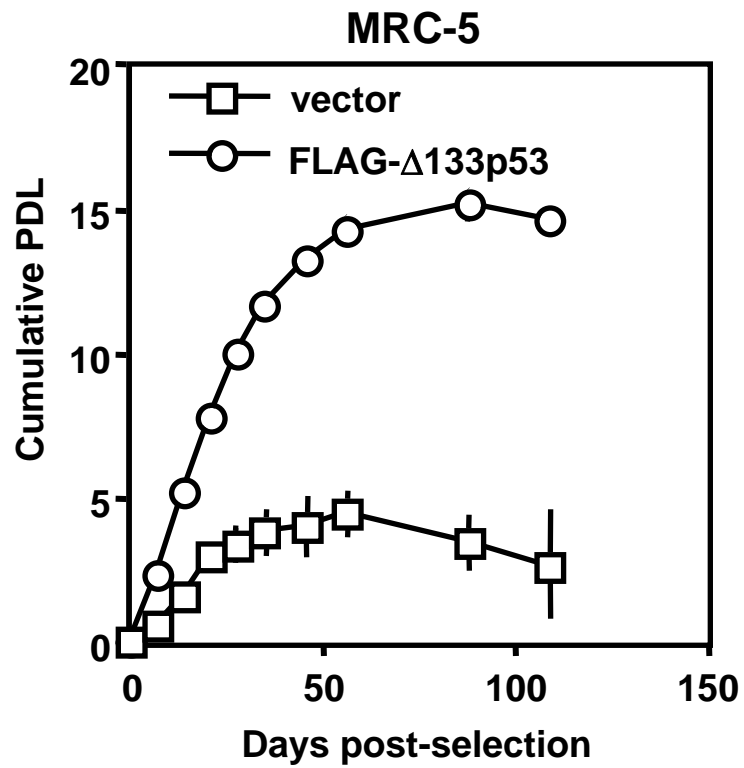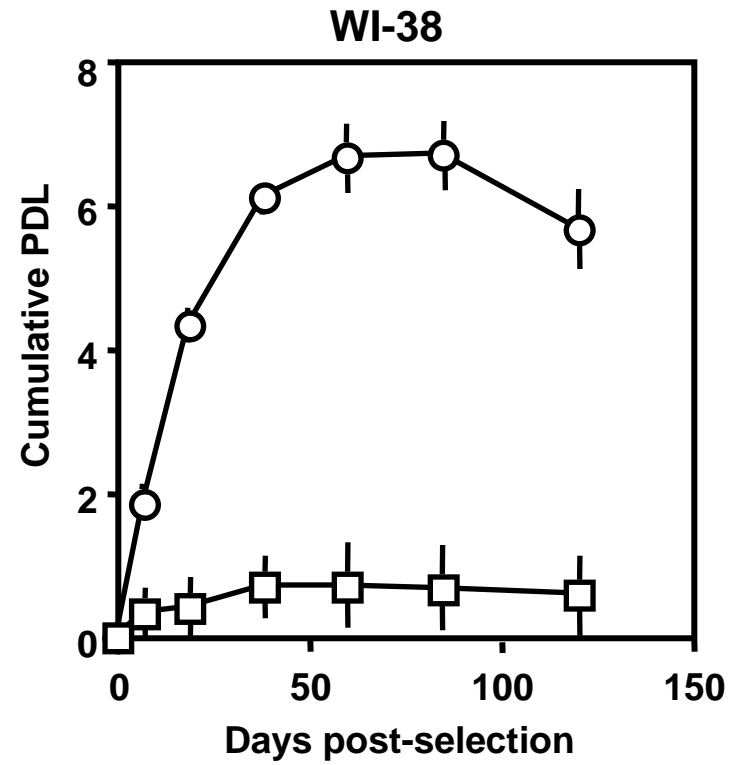

Supplementary Figure S6.  $\Delta 133p53$  overexpression extends the replicative lifespan in human fibroblasts.

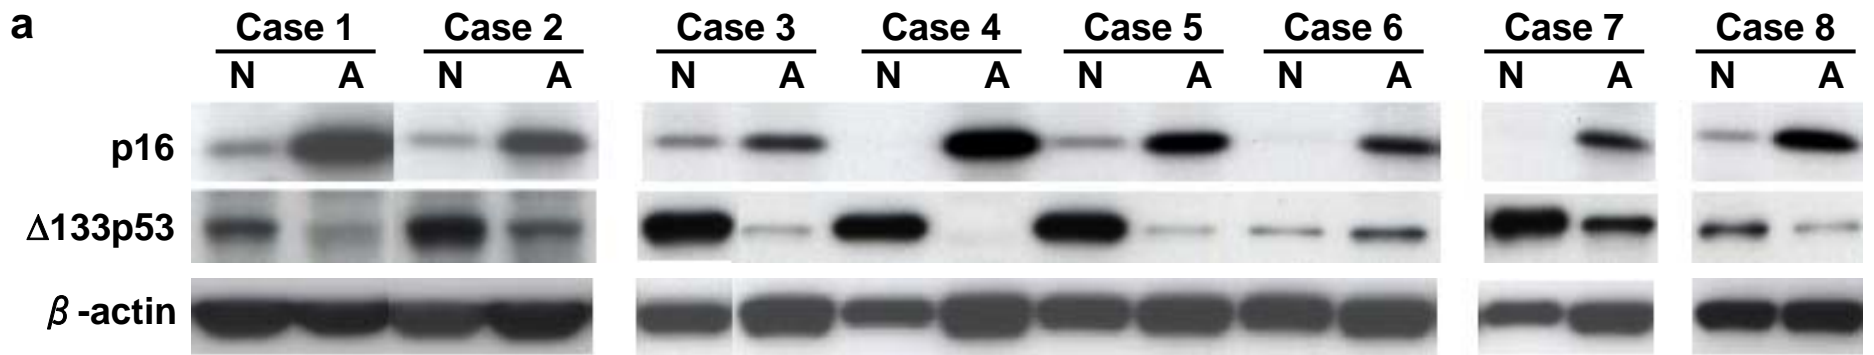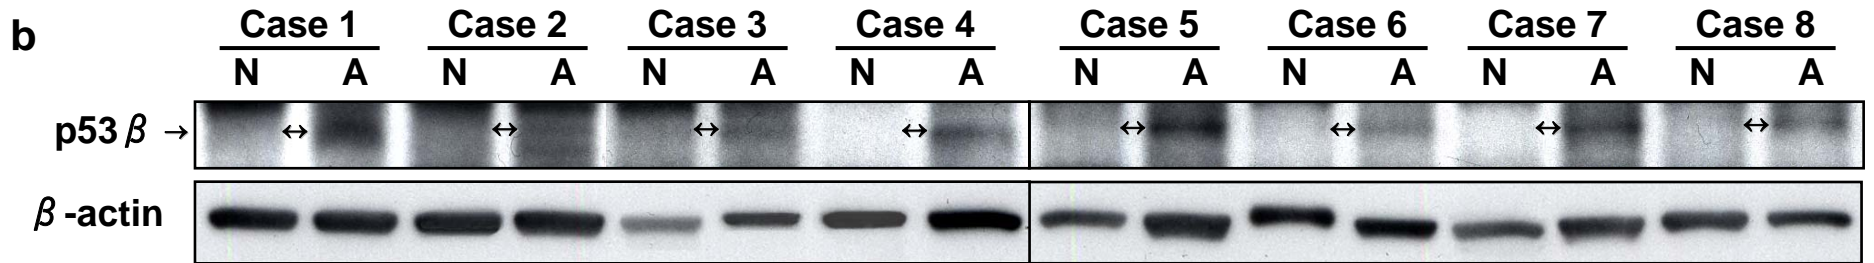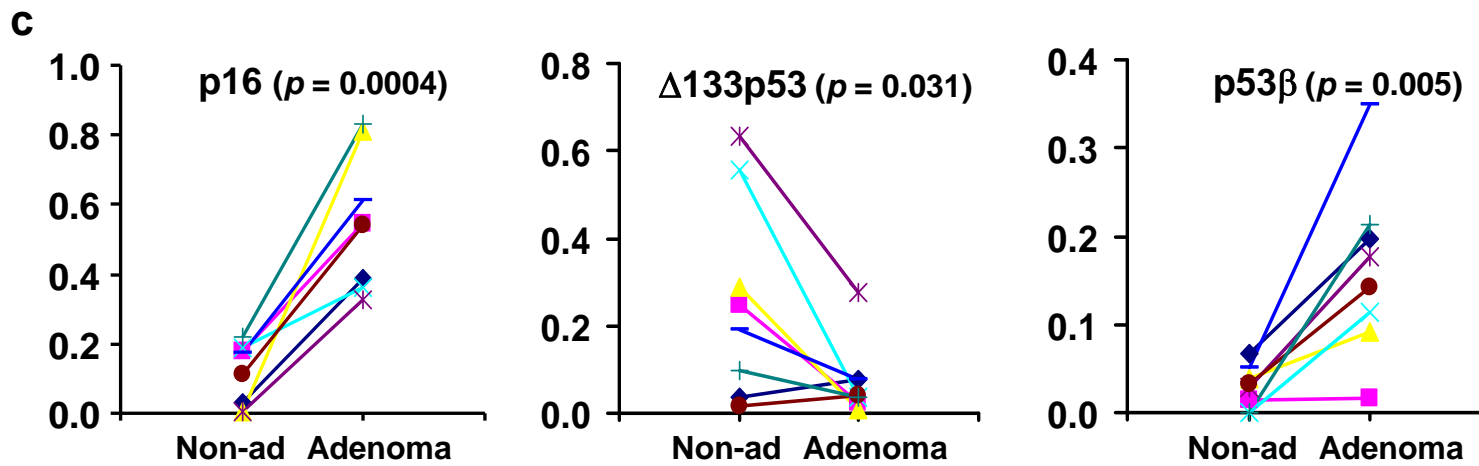

Supplementary Figure S7. Immunoblot analyses of p16<sup>INK4a</sup>,  $\Delta 133p53$  and p53 $\beta$  in human colon adenomas.

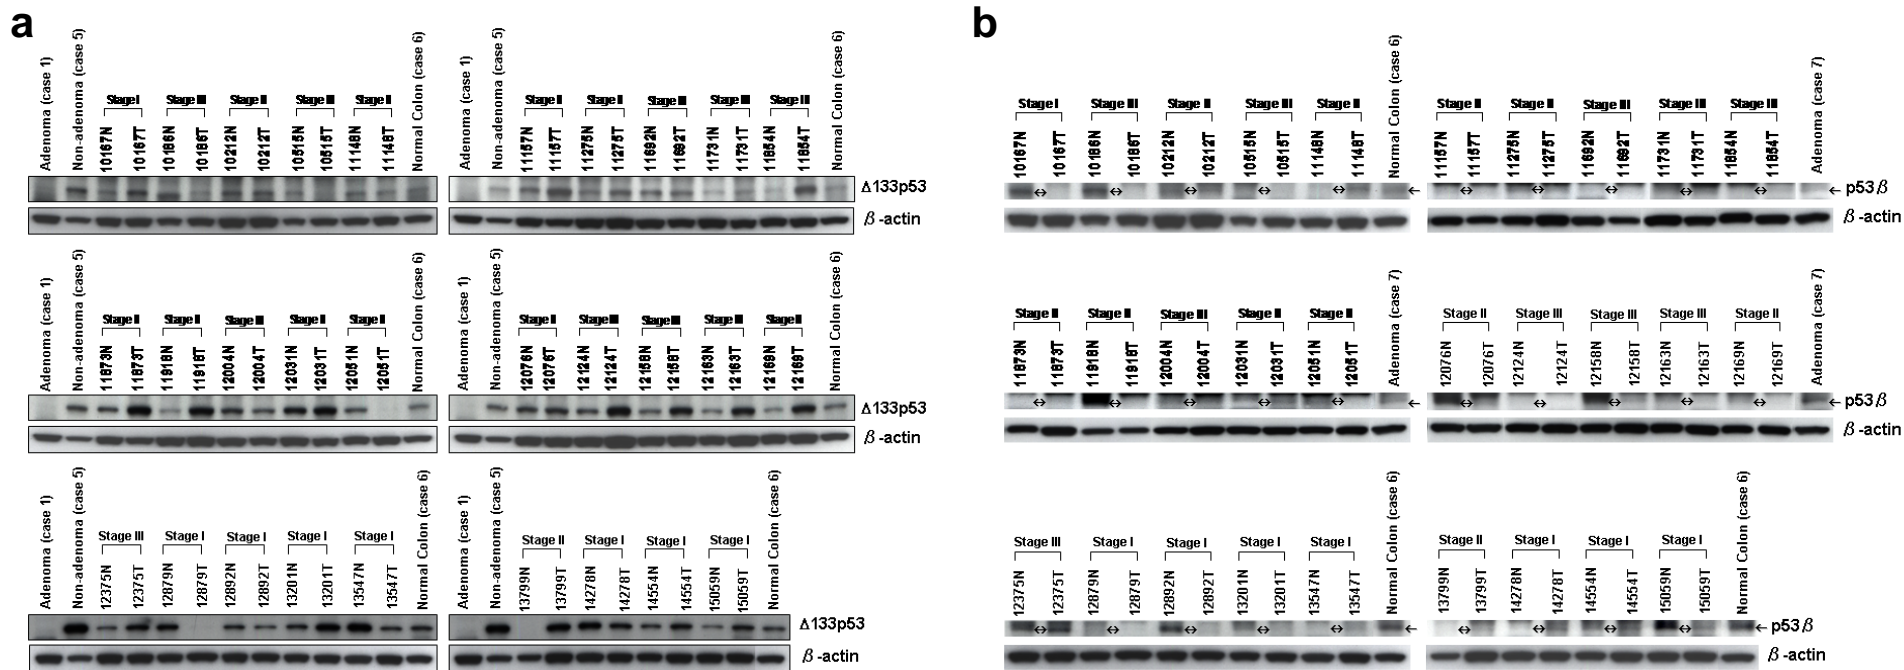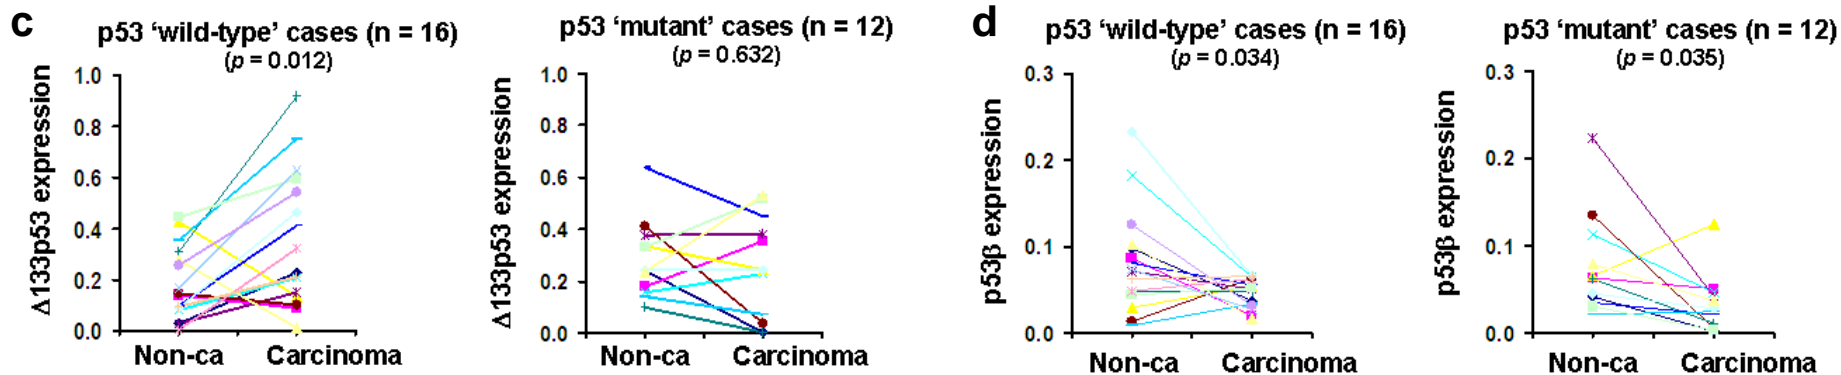

Supplementary Figure S8. Immunoblot analyses of  $\Delta 133p53$  and  $p53\beta$  in human colon carcinomas.

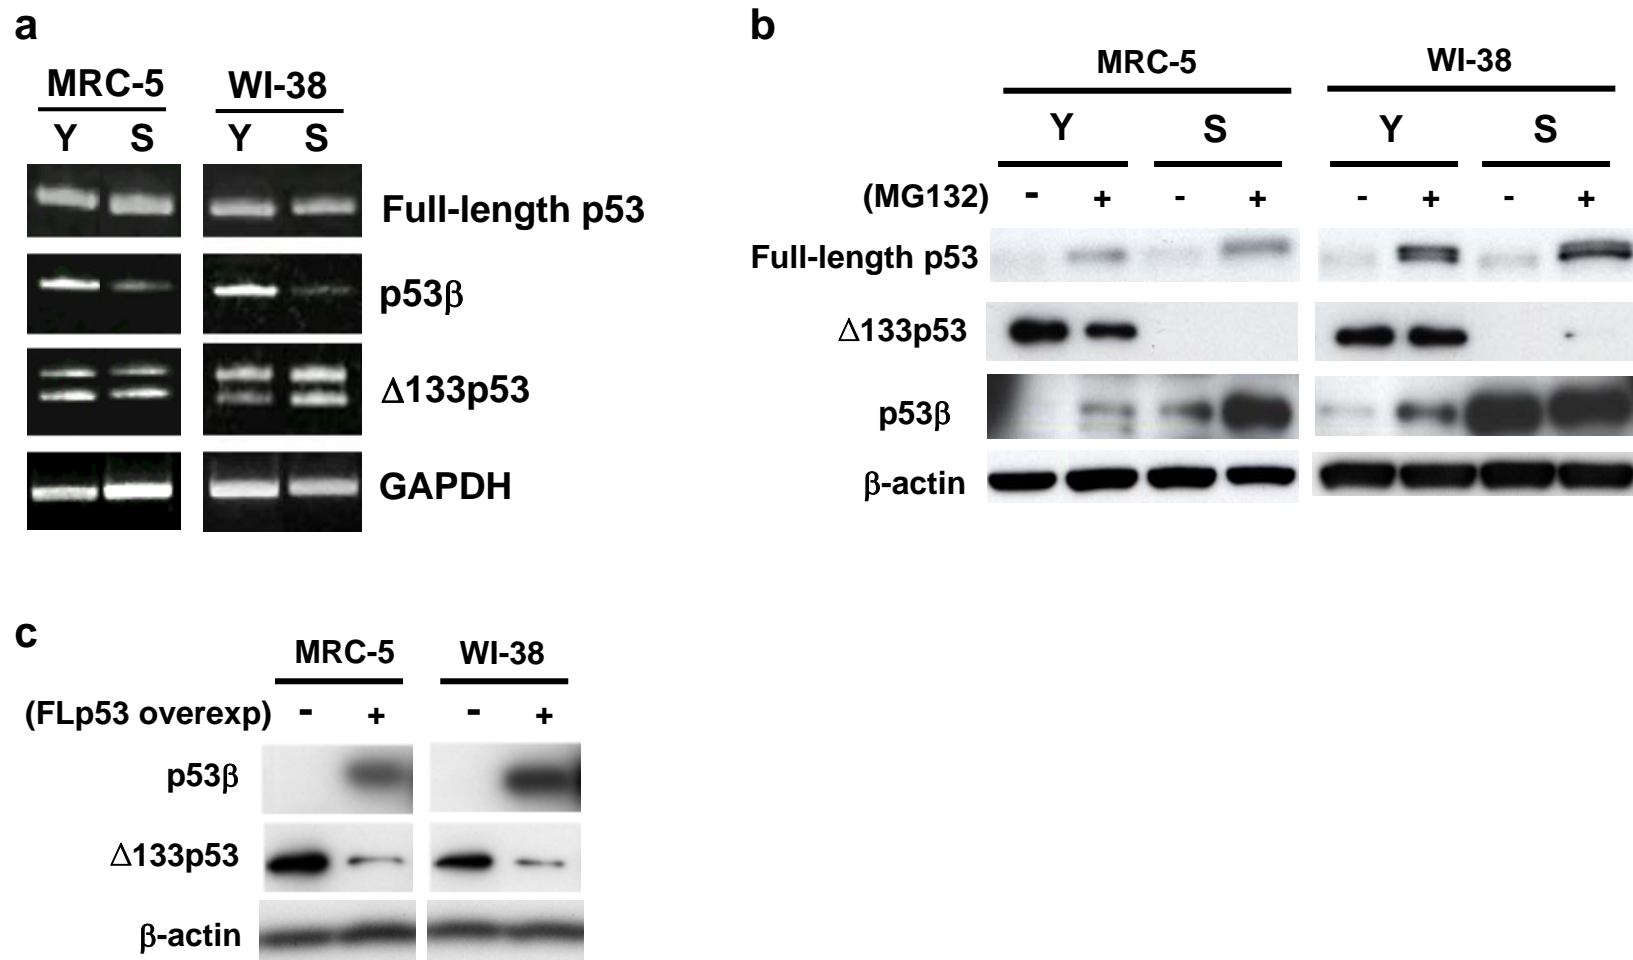

**Supplementary Figure S9. p53β and Δ133p53 are subject to different mechanisms of protein turnover and differentially regulated by full-length p53.**

**a**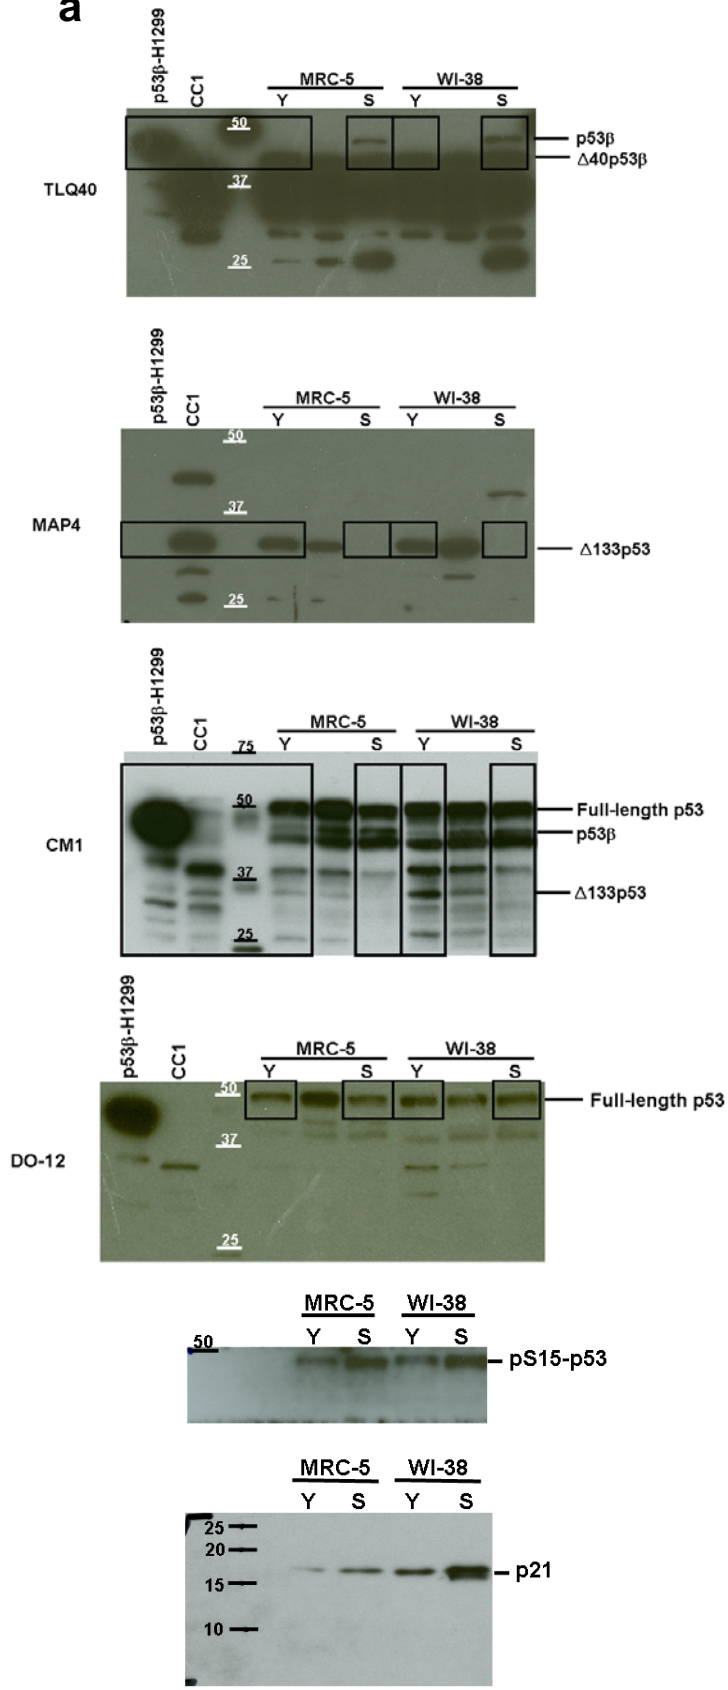**b**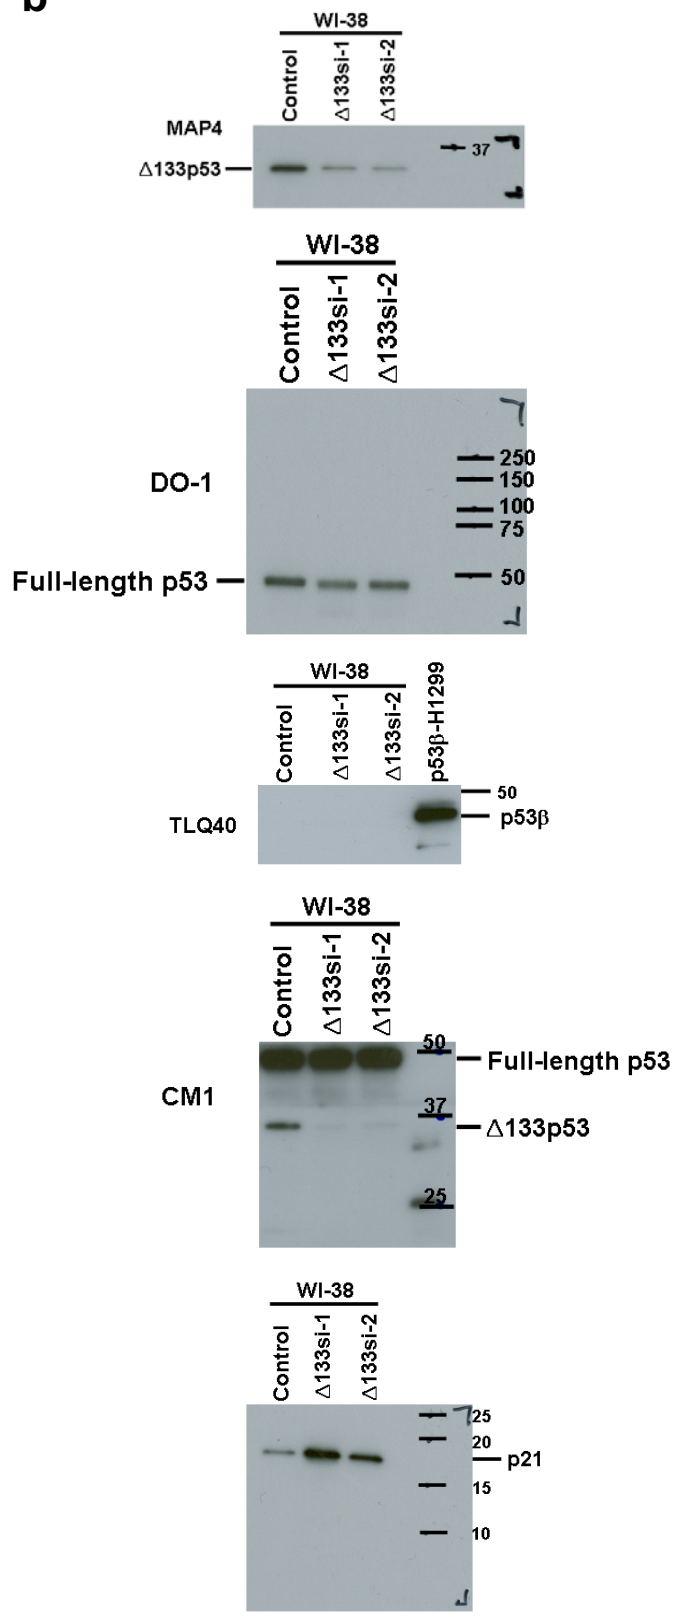

**Supplementary Table S1.**  
Information on normal colon samples obtained from immediate autopsy.

| Case number | Age | Gender | Cause of death                              |
|-------------|-----|--------|---------------------------------------------|
| 1           | 25  | Male   | Gun shot wound                              |
| 2           | 29  | Male   | Gun shot wound                              |
| 3           | 16  | Female | Motor vehicle accident (closed head injury) |
| 4           | 28  | Male   | Closed head injury                          |
| 5           | 23  | Female | Motor vehicle accident (closed head injury) |
| 6           | 52  | Female | Motor vehicle accident                      |
| 7           | 76  | Female | Motor vehicle accident                      |
| 8           | 20  | Male   | Motor vehicle accident                      |
| 9           | 19  | Female | Gun shot wound                              |

**Supplementary Table S2.**  
Information on 8 pairs of colon adenoma and non-adenoma samples.

| Case number | Age | Gender | Histopathological diagnosis |
|-------------|-----|--------|-----------------------------|
| 1           | 62  | Male   | Tubular adenoma             |
| 2           | 64  | Female | Tubular adenoma             |
| 3           | 87  | Female | Villous adenoma             |
| 4           | 84  | Male   | Villous adenoma             |
| 5           | 78  | Male   | Tubulovillous adenoma       |
| 6           | 66  | Male   | Tubular adenoma             |
| 7           | 79  | Male   | Villous adenoma             |
| 8           | 78  | Male   | Tubulovillous adenoma       |

Supplementary Table S3. Information on 29 cases of colon carcinoma.

| Case* | Gender | Age | Stage | p53 status** | Histology | Survival (months) |
|-------|--------|-----|-------|--------------|-----------|-------------------|
| 10167 | M      | 55  | I     | wild-type    | adeno     | 154.0             |
| 10186 | F      | 70  | III   | mutant       | adeno     | 153.6             |
| 10212 | F      | 66  | II    | wild-type    | mucinous  | 144.3             |
| 10515 | M      | 53  | III   | mutant       | adeno     | 61.9              |
| 11148 | F      | 63  | II    | wild-type    | adeno     | 26.6              |
| 11157 | M      | 73  | II    | wild-type    | adeno     | 130.1             |
| 11275 | M      | 76  | II    | wild-type    | adeno     | 90.4              |
| 11692 | M      | 58  | III   | mutant       | adeno     | 112.3             |
| 11731 | M      | 59  | III   | mutant       | mucinous  | 18.4              |
| 11854 | M      | 70  | III   | n.d.***      | adeno     | 18.8              |
| 11873 | M      | 72  | II    | wild-type    | adeno     | 106.7             |
| 11918 | M      | 59  | II    | wild-type    | adeno     | 104.9             |
| 12004 | M      | 51  | III   | mutant       | adeno     | 102.1             |
| 12031 | M      | 50  | II    | wild-type    | adeno     | 38.9              |
| 12051 | M      | 70  | II    | wild-type    | adeno     | 79.1              |
| 12076 | M      | 76  | II    | mutant       | adeno     | 100.1             |
| 12124 | M      | 60  | III   | mutant       | adeno     | 98.6              |
| 12158 | M      | 70  | III   | wild-type    | mucinous  | 97.9              |
| 12163 | M      | 53  | III   | mutant       | adeno     | 5.9               |
| 12169 | M      | 67  | II    | wild-type    | adeno     | 97.2              |
| 12375 | F      | 66  | III   | wild-type    | mucinous  | 92.2              |
| 12879 | M      | 80  | I     | mutant       | adeno     | 62.8              |
| 12892 | M      | 69  | I     | wild-type    | adeno     | 79.9              |
| 13201 | F      | 60  | I     | mutant       | adeno     | 72.4              |
| 13547 | M      | 69  | I     | wild-type    | adeno     | 55.5              |
| 13799 | M      | 44  | II    | wild-type    | adeno     | 61.2              |
| 14278 | M      | 59  | I     | mutant       | mucinous  | 54.1              |
| 14554 | M      | 59  | I     | mutant       | adeno     | 50.1              |
| 15059 | M      | 67  | I     | wild-type    | adeno     | 43.5              |

\* Schetter *et al.*, JAMA 299: 425-436, 2008.

\*\* p53 status was assumed to be 'wild-type' or 'mutant' by immunohistochemical staining of p53 and MDM2 (Costa *et al.*, J. Pathol. 176: 45-53, 1995; Nenutil *et al.*, J. Pathol. 207: 251-259, 2005).

\*\*\* Not determined.



**Supplementary Table S4.**

**$\Delta$ 133p53 and p53 $\beta$  expression in p53 'wild-type' and 'mutant' cases of colon carcinoma\*.**

| Case-stage                    | $\Delta$ 133p53 |           | p53 $\beta$ |           |
|-------------------------------|-----------------|-----------|-------------|-----------|
|                               | Non-ca          | Carcinoma | Non-ca      | Carcinoma |
| <b><u>p53 'wild-type'</u></b> |                 |           |             |           |
| 10167 - I                     | 0.0285          | 0.2276    | 0.0985      | 0.0372    |
| 12892 - I                     | 0.1376          | 0.0892    | 0.0868      | 0.0208    |
| 13547 - I                     | 0.4270          | 0.1329    | 0.0292      | 0.0546    |
| 15059 - I                     | 0.0816          | 0.2083    | 0.1828      | 0.0647    |
| 10212 - II                    | 0.0302          | 0.1529    | 0.0723      | 0.0512    |
| 11148 - II                    | 0.1458          | 0.1007    | 0.0132      | 0.0639    |
| 11157 - II                    | 0.3105          | 0.9175    | 0.0489      | 0.0480    |
| 11275 - II                    | 0.0986          | 0.4103    | 0.0813      | 0.0560    |
| 11873 - II                    | 0.3557          | 0.7519    | 0.0088      | 0.0338    |
| 11918 - II                    | 0.0885          | 0.4647    | 0.2323      | 0.0661    |
| 12031 - II                    | 0.4436          | 0.5961    | 0.0447      | 0.0530    |
| 12051 - II                    | 0.2774          | 0.0122    | 0.1025      | 0.0169    |
| 12169 - II                    | 0.1679          | 0.6279    | 0.0742      | 0.0271    |
| 13799 - II                    | 0.0033          | 0.3206    | 0.0488      | 0.0633    |
| 12158 - III                   | 0.2558          | 0.5446    | 0.1255      | 0.0317    |
| 12375 - III                   | 0.0944          | 0.2126    | 0.0633      | 0.0667    |
| <b><u>p53 'mutant'</u></b>    |                 |           |             |           |
| 12879 - I                     | 0.2421          | 0.0033    | 0.0416      | 0.0021    |
| 13201 - I                     | 0.1807          | 0.3560    | 0.0629      | 0.0513    |
| 14278 - I                     | 0.3356          | 0.2461    | 0.0658      | 0.1244    |
| 14554 - I                     | 0.1567          | 0.2301    | 0.1134      | 0.0460    |
| 12076 - II                    | 0.3786          | 0.3812    | 0.2232      | 0.0418    |
| 10186 - III                   | 0.4134          | 0.0396    | 0.1345      | 0.0060    |
| 10515 - III                   | 0.1003          | 0.0033    | 0.0617      | 0.0118    |
| 11692 - III                   | 0.6377          | 0.4520    | 0.0347      | 0.0220    |
| 11731 - III                   | 0.1403          | 0.0737    | 0.0213      | 0.0248    |
| 12004 - III                   | 0.2440          | 0.2460    | 0.0457      | 0.0281    |
| 12124 - III                   | 0.3315          | 0.5139    | 0.0309      | 0.0034    |
| 12163 - III                   | 0.2377          | 0.5289    | 0.0798      | 0.0370    |

**\*Normalized values of  $\Delta$ 133p53 and p53 $\beta$  expression (normalized with  $\beta$ -actin) were from quantitative analysis of the results shown in Supplementary Fig. S8a and S8b.**
